# Supplementary material for: Influence of Base Oil Polarity on the Tribological Performance of Surface Active Engine Oil Additives
Source: Research Square preprint supplement (doi:10.21203/rs.3.rs-276837/v1), 2021-04-12
Supplement: Supplementary file 1 [file 4512b3e8e187e7dcc523bc96.docx]

**Appendix**

|  |  |
| --- | --- |

Figure A: FT-IR data for tested and untested samples, a) PAO and b) ester oil.

|  |  |
| --- | --- |
|  |  |
|  |  |
|  |  |

Figure B: ToF-SIMS positive (left) and negative (right) ion spectra of steel surface lubricated with PAO and ester oil.

|  |  |
| --- | --- |
|  |  |
|  |  |
|  |  |

Figure C: Positive (left) and negative ion spectra (right) of oleamide derived tribofilms in PAO and ester oil (* characteristic peaks of oleamide).

|  | Total | S- | PO2- | FeO- | Total | S- | PO2- | FeO- |
| --- | --- | --- | --- | --- | --- | --- | --- | --- |
|  | PAO + ZDDP | | | | Ester oil + ZDDP | | | |
| (x,y) all |  |  |  |  |  |  |  |  |
| Depth a (x,y) |  |  |  |  |  |  |  |  |
| Depth b (x, y) |  |  |  |  |  |  |  |  |
| Mid-point cross sectional x, z scan |  |  |  |  |  |  |  |  |
|  | PAO + ZDDP + GMO | | | | Ester oil + ZDDP + GMO | | | |
| (x,y) all |  |  |  |  |  |  |  |  |
| Depth a (x,y) |  |  |  |  |  |  |  |  |
| Depth b  (x, y) |  |  |  |  |  |  |  |  |
| Mid-point cross sectional x, z scan |  |  |  |  |  |  |  |  |
|  | PAO + ZDDP + oleamide | | | | PAO + ZDDP + Oleamide | | | |
| (x,y) all |  |  |  |  |  |  |  |  |
| Depth a (x,y) |  |  |  |  |  |  |  |  |
| Depth b (x, y) |  |  |  |  |  |  |  |  |
| Mid-point cross sectional x, z scan |  |  |  |  |  |  |  |  |

Figure D: 3-D analysis from 100 x 100 µm2 analysis area of total x, y scans, at two given depth (a & b) and mid-point cross-sectional x, z scans of selected ions for different samples within wear scar.

|  |  |
| --- | --- |
|  |  |
|  |  |
|  |  |

Figure E: Positive (left) and negative ion spectra (right) of ZDDP + oleamide derived tribofilms in PAO and ester oil (* characteristic peaks of ZDDP).
